# Supplementary material for: Comparison of rates of safety issues and reporting of trial outcomes for medical devices approved in the European Union and United States: cohort study
Source: PubMed Central journal article supplement — BMJ. 2016 Jun 28;353:i3323. doi: 10.1136/bmj.i3323 (PMC4925918; doi:10.1136/bmj.i3323), 2016-06-28
Supplement: hwat032105.ww1_default.pdf [file hwat032105.ww1_default.pdf]

## Supplemental Appendix

**Appendix Table 1.** Sub-Categorization of Medical Devices Included in Study Sample

| <b>Novel Medical Devices (N = 309)</b> | <b>Examples</b>                         |
|----------------------------------------|-----------------------------------------|
| Cardiovascular                         |                                         |
| Cardiac (ventricular) assist devices   | Ventricular assist device               |
| Cardiac prosthetic devices             | Transcatheter heart valve               |
| Cardiac rhythm management              | Implantable cardioverter defibrillators |
| Interventional cardiology              | Drug-eluting coronary stent             |
| Electrophysiology                      | Cardiac ablation catheter               |
| Cardiac surgery and other              | Vascular closure device                 |
| Neurologic                             |                                         |
| Neuromodulation                        | Deep brain stimulation device           |
| Neurology therapeutic devices          | Intracranial aneurysm flow diverter     |
| Other neurology                        | Neurodiagnostic electrodes              |
| Orthopedic                             |                                         |
| Joint reconstruction                   | Knee replacement                        |
| Spinal and other orthopedic            | Intervertebral fusion device            |

**Appendix Table 2.** Results from Multivariable Linear Regression Model of Time Differentials between CE Marking and FDA Approval

| Characteristic                | Coefficient (months) | 95% confidence interval (CI) | P value |
|-------------------------------|----------------------|------------------------------|---------|
| CE Marking year               |                      |                              |         |
| 2005                          | 1 [Reference]        |                              |         |
| 2006                          | -4.69                | (-17.5-8.10)                 | 0.47    |
| 2007                          | 0.04                 | (-10.3-10.4)                 | 0.99    |
| 2008                          | -0.75                | (-12.2-10.7)                 | 0.90    |
| 2009                          | -3.13                | (-13.6-7.4)                  | 0.56    |
| 2010                          | -6.45                | (-16.8-3.9)                  | 0.22    |
| Therapeutic sub-category      |                      |                              |         |
| Cardiac assist devices        | 1 [Reference]        |                              |         |
| Cardiac prosthetic devices    | 0.25                 | (-10.9-11.4)                 | 0.97    |
| Cardiac rhythm management     | -12.8                | (-23.4--2.06)                | 0.02    |
| Interventional cardiology     | -2.04                | (-11.1-7.0)                  | 0.66    |
| Electrophysiology             | -2.14                | (-14.5-10.2)                 | 0.73    |
| Cardiac surgery and other     | -3.98                | (-15.7-7.70)                 | 0.50    |
| Neuromodulation devices       | -13.7                | (-31.8-4.39)                 | 0.14    |
| Neurology therapeutic devices | -16.0                | (-32.0-0.02)                 | 0.05    |
| Other neurologic devices      | -15.6                | (-26.5--4.66)                | 0.01    |
| Joint reconstruction          | -4.32                | (-26.7-18.0)                 | 0.70    |
| Spinal and other orthopedic   | -5.95                | (-16.0-4.04)                 | 0.24    |
| Major innovation              |                      |                              |         |
| Yes                           | 0.93                 | (-5.14-6.99)                 | 0.76    |
| No                            | 1 [Reference]        |                              |         |
| Regulatory pathway            |                      |                              |         |
| Not FDA approved              | 1 [Reference]        |                              |         |
| 510(k) clearance              | 5.89                 | (-0.23-12.0)                 | 0.06    |
| PMA <sup>a</sup>              | 38.0                 | (29.9-46.1)                  | <0.001  |
| PMA supplement                | 20.5                 | (12.5-28.5)                  | <0.001  |
| Firm type                     |                      |                              |         |
| Large (≥US\$1B)               | -2.05                | (-7.80-3.71)                 | 0.49    |
| Small (<US\$1B)               | 1 [Reference]        |                              |         |

Notes: Estimated time differentials and confidence intervals (CI) are from multivariable linear regression models. Regulatory pathway refers to approval route in the US (premarket approval, premarket supplement, 510(k) clearance, or humanitarian device exemption) or not yet FDA approved. <sup>a</sup> Includes 4 HDE devices

**Appendix Table 3.** Results from Multivariable Cox Regression Models of Safety Alerts and Recalls

| Characteristic                | HR (95% CI)<br>Alert or Recall | P value | HR (95% CI)<br>Recall Only | P value        |
|-------------------------------|--------------------------------|---------|----------------------------|----------------|
| First approval year           |                                |         |                            |                |
| 2005 <sup>a</sup>             | 1 [Reference]                  |         | 1 [Reference]              |                |
| 2006                          | 0.80 (0.29-2.17)               | 0.66    | 0.67 (0.16-2.81)           | 0.58           |
| 2007                          | 0.98 (0.42-2.30)               | 0.97    | 1.56 (0.52-4.64)           | 0.43           |
| 2008                          | 0.96 (0.43-2.13)               | 0.91    | 1.28 (0.44-3.67)           | 0.65           |
| 2009                          | 0.80 (0.36-1.77)               | 0.58    | 1.58 (0.58-4.34)           | 0.38           |
| 2010                          | 0.57 (0.23-1.39)               | 0.22    | 0.71 (0.21-2.33)           | 0.57           |
| Therapeutic category          |                                |         |                            |                |
| Cardiac assist devices        | 1 [Reference]                  |         | 1 [Reference]              |                |
| Cardiac prosthetic devices    | 1.25 (0.39-4.02)               | 0.70    | 1.42 (0.38-5.37)           | 0.60           |
| Cardiac rhythm management     | 1.32 (0.39-4.40)               | 0.66    | 0.95 (0.23-3.83)           | 0.94           |
| Interventional cardiology     | 0.43 (0.13-1.42)               | 0.17    | 0.40 (0.10-1.57)           | 0.19           |
| Electrophysiology             | 0.70 (0.15-3.31)               | 0.66    | 0.62 (0.10-3.97)           | 0.61           |
| Cardiac surgery and other     | 0.53 (0.13-2.24)               | 0.39    | 0.79 (0.16-3.76)           | 0.76           |
| Neuromodulation devices       | 2.45 (0.66-9.08)               | 0.18    | 2.43 (0.51-11.5)           | 0.26           |
| Neurology therapeutic devices | 1.40 (0.28-7.04)               | 0.68    | — <sup>b</sup>             | — <sup>b</sup> |
| Other neurologic devices      | 2.49 (0.24-26.1)               | 0.45    | 5.95 (0.46-77.8)           | 0.17           |
| Joint reconstruction          | 0.98 (0.17-5.56)               | 0.99    | 1.13 (0.18-7.00)           | 0.90           |
| Spinal and other orthopedic   | 0.50 (0.11-2.33)               | 0.38    | 0.20 (0.02-2.02)           | 0.17           |
| First approved in EU          |                                |         |                            |                |
| Yes                           | 2.95 (1.40-6.22)               | 0.005   | 4.64 (1.54-14.0)           | 0.006          |
| No                            | 1 [Reference]                  |         | 1 [Reference]              |                |
| Major innovation              |                                |         |                            |                |
| Yes                           | 0.99 (0.57-1.70)               | 0.96    | 0.76 (0.38-1.52)           | 0.44           |
| No                            | 1 [Reference]                  |         | 1 [Reference]              |                |
| Regulatory pathway            |                                |         |                            |                |
| Not FDA approved              | 1 [Reference]                  |         | 1 [Reference]              |                |
| 510(k) clearance              | 1.28 (0.56-2.90)               | 0.56    | 0.92 (0.33-2.58)           | 0.88           |
| PMA <sup>c</sup>              | 1.71 (0.78-3.75)               | 0.18    | 1.28 (0.48-3.41)           | 0.63           |
| PMA supplement                | 1.82 (0.86-3.88)               | 0.12    | 1.86 (0.81-4.30)           | 0.15           |
| Firm type                     |                                |         |                            |                |
| Large (≥US\$1B)               | 0.93 (0.54-1.62)               | 0.81    | 0.75 (0.39-1.47)           | 0.40           |
| Small (<US\$1B)               | 1 [Reference]                  |         | 1 [Reference]              |                |

Notes: Hazard ratios (HR) and confidence intervals (CI) are from multivariable Cox regression models for safety alerts and recalls or recalls only. First approval year refers to the earlier of the year of device approval in the EU (CE marking) or in the US (premarket approval, premarket supplement, 510(k) clearance, or humanitarian device exemption [HDE]). <sup>a</sup> Includes six devices that were first approved in the US before 2005 (2003-2004). <sup>b</sup> Omitted due to collinearity. <sup>c</sup> Includes 4 HDE devices.

**Appendix Table 4.** Results from Multivariable Cox Regression Model in Sensitivity Analysis with Continuous Time Variable

| <b>Characteristic</b>         | <b>HR (95% CI)<br/>Alert or Recall</b> | <b>95% confidence<br/>interval (CI)</b> | <b>P value</b> |
|-------------------------------|----------------------------------------|-----------------------------------------|----------------|
| First approval year           | 0.92                                   | (0.79 – 1.07)                           | 0.29           |
| Therapeutic category          |                                        |                                         |                |
| Cardiac assist devices        | 1 [Reference]                          |                                         |                |
| Cardiac prosthetic devices    | 1.54                                   | (0.33 – 7.07)                           | 0.58           |
| Cardiac rhythm management     | 1.65                                   | (0.35 – 7.80)                           | 0.53           |
| Interventional cardiology     | 0.42                                   | (0.09 – 2.06)                           | 0.29           |
| Electrophysiology             | 0.76                                   | (0.12 – 4.73)                           | 0.77           |
| Cardiac surgery and other     | 0.72                                   | (0.12 – 4.16)                           | 0.71           |
| Neuromodulation devices       | 3.28                                   | (0.65 – 16.5)                           | 0.15           |
| Neurology therapeutic devices | 1.10                                   | (0.09 – 13.9)                           | 0.94           |
| Other neurologic devices      | 5.65                                   | (0.43 – 74.0)                           | 0.19           |
| Joint reconstruction          | 1.34                                   | (0.18 – 9.87)                           | 0.77           |
| Spinal and other orthopedic   | 0.24                                   | (0.02 – 2.82)                           | 0.26           |
| First approved in EU          |                                        |                                         |                |
| Yes                           | 2.55                                   | (1.14 – 5.71)                           | 0.02           |
| No                            | 1 [Reference]                          |                                         |                |
| Major innovation              |                                        |                                         |                |
| Yes                           | 1.06                                   | (0.59 – 1.92)                           | 0.84           |
| No                            | 1 [Reference]                          |                                         |                |
| Regulatory pathway            |                                        |                                         |                |
| Not FDA approved              | 1 [Reference]                          |                                         |                |
| 510(k) clearance              | 0.45                                   | (0.15 – 1.31)                           | 0.14           |
| PMA <sup>a</sup>              | 1.25                                   | (0.56 – 2.79)                           | 0.59           |
| PMA supplement                | 1.20                                   | (0.56 – 2.56)                           | 0.65           |
| Firm type                     |                                        |                                         |                |
| Large (≥US\$1B)               | 0.84                                   | (0.47 – 1.48)                           | 0.54           |
| Small (<US\$1B)               | 1 [Reference]                          |                                         |                |

Notes: Hazard ratios (HR) and confidence intervals (CI) are from multivariable Cox regression model of safety alert or recall. First approval year refers to the earlier of the year of device approval in the EU (CE marking) or in the US (premarket approval, premarket supplement, 510(k) clearance, or humanitarian device exemption). <sup>a</sup> Includes 4 HDE devices.

**Appendix Table 5.** Results from Multivariable Cox Regression Model in Sensitivity Analysis

| Characteristic                | HR (95% CI)<br><i>Alert or Recall</i> | 95% confidence<br>interval (CI) | <i>P</i> value |
|-------------------------------|---------------------------------------|---------------------------------|----------------|
| First approval year           |                                       |                                 |                |
| 2005 <sup>a</sup>             | 1 [Reference]                         |                                 |                |
| 2006                          | 0.32                                  | (0.08 – 1.23)                   | 0.10           |
| 2007                          | 0.96                                  | (0.39 – 2.37)                   | 0.94           |
| 2008                          | 0.92                                  | (0.40 – 2.11)                   | 0.84           |
| 2009                          | 0.79                                  | (0.34 – 1.84)                   | 0.59           |
| 2010                          | 0.39                                  | (0.15 – 1.01)                   | 0.05           |
| Therapeutic area              |                                       |                                 |                |
| Cardiovascular                | 1 [Reference]                         |                                 |                |
| Neurologic                    | 4.11                                  | (0.79 – 21.2)                   | 0.09           |
| Orthopedic                    | 0.27                                  | (0.02 – 3.09)                   | 0.29           |
| Therapeutic sub-category      |                                       |                                 |                |
| Cardiac assist devices        | 1 [Reference]                         |                                 |                |
| Cardiac prosthetic devices    | 1.97                                  | (0.42 – 9.21)                   | 0.39           |
| Cardiac rhythm management     | 2.14                                  | (0.45 – 10.2)                   | 0.34           |
| Interventional cardiology     | 0.47                                  | (0.10 – 2.31)                   | 0.35           |
| Electrophysiology             | 0.95                                  | (0.15 – 6.14)                   | 0.96           |
| Cardiac surgery and other     | 0.94                                  | (0.16 – 5.66)                   | 0.95           |
| Neuromodulation devices       | – <sup>b</sup>                        | – <sup>b</sup>                  | – <sup>b</sup> |
| Neurology therapeutic devices | 0.25                                  | (0.03 – 2.36)                   | 0.23           |
| Other neurologic devices      | 1.26                                  | (0.12 – 12.8)                   | 0.85           |
| Joint reconstruction          | 4.48                                  | (0.40 – 50.5)                   | 0.23           |
| Spinal and other orthopedic   | – <sup>b</sup>                        | – <sup>b</sup>                  | – <sup>b</sup> |
| First approved in EU          |                                       |                                 |                |
| Yes                           | 2.58                                  | (1.14 – 5.83)                   | 0.02           |
| No                            | 1 [Reference]                         |                                 |                |
| Major innovation              |                                       |                                 |                |
| Yes                           | 1.09                                  | (0.60 – 1.96)                   | 0.78           |
| No                            | 1 [Reference]                         |                                 |                |
| Regulatory pathway            |                                       |                                 |                |
| Not FDA approved              | 1 [Reference]                         |                                 |                |
| 510(k) clearance              | 0.42                                  | (0.14 – 1.26)                   | 0.12           |
| PMA <sup>c</sup>              | 1.25                                  | (0.54 – 2.90)                   | 0.60           |
| PMA supplement                | 0.94                                  | (0.42 – 2.08)                   | 0.88           |
| Firm type                     |                                       |                                 |                |
| Large (≥US\$1B)               | 0.79                                  | (0.43 – 1.44)                   | 0.44           |
| Small (<US\$1B)               | 1 [Reference]                         |                                 |                |

Notes: Hazard ratios (HR) and confidence intervals (CI) are from multivariable Cox regression model of safety alert or recall. First approval year refers to the earlier of the year of device approval in the EU (CE marking) or in the US (premarket approval, premarket supplement, 510(k) clearance, or humanitarian device exemption). <sup>a</sup> Includes six devices that were first approved in the US before 2005 (2003-2004). <sup>b</sup> Omitted due to collinearity. <sup>c</sup> Includes 4 HDE devices

## Appendix Methods

### Detailed Description of Study Cohort and Search Strategy

Our study cohort comprised new cardiovascular, neurologic, and orthopedic devices granted CE marking between January 1, 2005 and December 31, 2010. Since there is no centralized database of approved devices available to the public (access to one such database, known as European Databank on Medical Devices or Eudamed, is restricted to national competent authorities and the European Commission), we relied on public and commercial sources to construct a novel dataset of CE-marked devices, and we focused on “high-profile” devices, defined as those with publicly-announced regulatory approvals.

We employed a flexible and iterative search strategy to identify potential devices for inclusion and remove duplicate or ineligible devices. First, we performed a search of Factiva (Dow Jones, New York, USA) for company press releases and news articles mentioning devices granted CE marking using the search terms: CE mark OR CE marking OR CE approval OR CE mark approval OR European market approval OR Europe market approval OR European market launch OR Europe market launch OR EU market launch OR European commercial approval OR Europe commercial approval OR European commercial launch OR Europe commercial launch OR EU commercial launch OR European approval OR Europe approval OR European launch OR Europe launch OR EU launch. Second, we performed a similar search of S&P Capital IQ (McGraw Hill Financial, New York, USA) and Bloomberg (Bloomberg L.P., New York, USA). These two databases compile annual reports, financial regulatory filings, transcripts of earnings and investor relations calls, and stock analyst reports, primarily for publicly-traded companies (although there is some coverage of private companies). For the search of stock analyst reports, we widened the date range (January 1, 2005 to January 31, 2016) to account for the potential delay in mentioning of CE marking status. Third, we repeated our search using Google (main search engine) and, separately, Google News (restricted date range of January 1, 2005 to December 31, 2010). Finally, we manually searched news articles for CE mark OR European launch in the following trade publications: Clinica Medical Devices (Informa plc, London, UK), The Gray Sheet (Informa plc, London, UK), The Pink Sheet (Informa plc, London, UK), and FierceMedicalDevices (FierceMarkets, Washington D.C., USA).

An annotated example of a search result is provided on the following page:

## Ventracor ASX Announcement; CE Mark Approval for VentrAssist(TM)

18 December 2006

⇒ Extracted date of CE marking

Ventracor (ASX: VCR OTC Bulletin Board: VTCRY) today announced the British Standards Institute (BSI) has approved CE Marking for the VentrAssist left ventricular assist device (LVAD).

⇒ Confirmed that the press release, announcement, news article, or other source is referring to receipt of CE marking and/or planned EU market launch

CE Mark approval allows Ventracor to market and sell the VentrAssist throughout Europe.

Ventracor Chief Executive Officer Peter Crosby said: "We are very excited that we have achieved a major milestone, and the VentrAssist is now commercially available throughout the whole of Europe.

"Regulatory approval is a very important first step towards market acceptance. We will continue our drive to develop strong clinical data published in reputable scientific journals by key opinion leaders, which is essential to build market acceptance that will drive future sales.

"Now we have CE Mark approval for the VentrAssist, we will back that up with outstanding field, clinical and technical support and we look forward to growing our business in Europe," Mr. Crosby said.

"An important part of our strategy is building partnerships with key opinion leaders through the BRACE study, which maintains the momentum with the CE Mark clinical trial," Mr. Crosby said.

Three new centres have enrolled their first VentrAssist patients, taking the total VentrAssist clinical experience to nearly 80 patients at 12 centres worldwide.

In France, the Hospital Cardiologique Louis Pradel in Lyon, and the Institute du Thorax in Nantes, treated patients under the BRACE Clinical Study.

In the US, the University of Minnesota Hospitals and Clinics in Minneapolis treated a patient under the US Feasibility Trial.

About Ventracor: Ventracor is a global medical device company which has developed an implantable blood pump, the VentrAssist left ventricular assist device (LVAD), as therapy to improve the lives of heart failure patients and their families. Ventracor is dedicated to building partnerships with healthcare professionals to make the VentrAssist the standard-of-care worldwide.

## Appendix Protocol

### Determination of ‘Major Innovation’ Status for Studied Devices

| Criteria for Major Innovation                                                                                                                                                              | Example and Commentary                                                                                                                                                                                                                                                                                                                                                                                                                                                                                                                                                                                                                                                                                                                                                                                                                                                                                                                                                                                          |
|--------------------------------------------------------------------------------------------------------------------------------------------------------------------------------------------|-----------------------------------------------------------------------------------------------------------------------------------------------------------------------------------------------------------------------------------------------------------------------------------------------------------------------------------------------------------------------------------------------------------------------------------------------------------------------------------------------------------------------------------------------------------------------------------------------------------------------------------------------------------------------------------------------------------------------------------------------------------------------------------------------------------------------------------------------------------------------------------------------------------------------------------------------------------------------------------------------------------------|
| <p>1. The device is the first in an entirely new class of products in the US (by FDA, any pathway) <u>and</u> Europe (CE mark).</p>                                                        | <ul style="list-style-type: none"> <li>e.g., Melody Transcatheter Pulmonary Valve – first transcatheter pulmonary valve that received regulatory approval in US and Europe (CE marked in 2006)</li> <li>Most such new devices are subject to FDA premarket approval (<u>see</u> 21 CFR 814.1)</li> </ul>                                                                                                                                                                                                                                                                                                                                                                                                                                                                                                                                                                                                                                                                                                        |
| <p>2. The device involves new technology (and may incorporate components of already marketed devices) <u>and</u> makes new claims w/r/t the safety and/or effectiveness of the device.</p> | <ul style="list-style-type: none"> <li>e.g., Epiducer Lead Delivery System – first-of-its-kind system intended to introduce neurostimulation perc-paddle leads, typically as an alternative to laminotomy (As seen from this example, some 510(k)-cleared devices were classified as ‘major innovations,’ reflecting the fact that the choice of regulatory pathway is not a perfect predictor of device risk or novelty.)</li> </ul>                                                                                                                                                                                                                                                                                                                                                                                                                                                                                                                                                                           |
| <p>3. The device involves new technology (and may incorporate components of already marketed devices) <u>and</u> is intended to be used in a new or expanded patient population.</p>       | <ul style="list-style-type: none"> <li>e.g., Resolute Integrity Zotarolimus-Eluting Coronary Stent – uses the same stent design, drug, and base material as existing stents <u>but</u> uses a new polymer in the drug-polymer stent coating, uses a different delivery system, and is indicated for a target population that now includes those with diabetes mellitus with symptomatic ischemic heart disease</li> <li>We propose to use some discretion to define an “expanded” patient population. For example, we would not consider as a ‘major innovation’ a minor difference in indication for a stent for patients with stenotic lesions length <math>\leq 27</math>mm with reference vessel diameter of 2.75-5.0mm versus a stent for patients with lesions of length <math>\leq 28</math>mm with reference vessel diameters of 2.5-5.0mm.</li> </ul>                                                                                                                                                  |
| <p><i>“Other Change” Devices</i></p>                                                                                                                                                       | <ul style="list-style-type: none"> <li>We propose to exclude already marketed devices that are approved for an entirely new patient population, or approved with new or expanded claims on its safety and/or effectiveness, than that for its already approved indication(s). This is consistent with the FDA’s definitions for new molecular entities (<u>see</u> 21 CFR 314.108)</li> <li>We propose to exclude devices that are substantially equivalent (or that may differ due to minor technical changes) to existing devices on the market <u>and</u> do not make new safety and/or effectiveness claims or are not intended to be used in a new or expanded patient population. We referred to the definition used by FDA for “substantial equivalence” (<u>see</u> section 513(i) of the Food, Drug, and Cosmetic Act)</li> <li>We propose to exclude devices that differ from existing products due to minor technical, mechanical, procedural, system / process, or manufacturing changes</li> </ul> |
